# Supplementary material for: Interlaboratory Comparison of SpermX™ and Conventional Differential Extractions Indicated High Male DNA Recovery by the SpermX Method
Source: Preprints.org preprint supplement (doi:10.20944/preprints202309.0569.v1), 2023-09-08
Supplement: Supplementary file 2 [file Supp Figure Legends.docx]

Figure A. Average total human (S) to male DNA (Y) ratios and standard deviations in the sperm fractions for mixtures A-D (Lab 2 and Lab 3).

Figure B. Average percentage of male DNA recovered and standard deviations in the sperm fractions for mixtures A-D (Lab 2 and Lab 3).

Figure C. Average percentage female carryover and standard deviations in the sperm fractions for mixtures A-D (Lab 2 and Lab 3).

Figure D. Percentage of unshared male alleles recovered in the sperm fractions for mixtures A-D (Lab 2 and Lab 3).

Figure E. STRmix™ male profile proportions in the sperm fractions for mixtures A-D (Lab 2 and Lab 3).

Figure F. Likelihood ratios for the male profile probabilities in the sperm fractions for mixtures A-D (Lab 2 and Lab 3).
